# Supplementary material for: Interpreting space-based trends in carbon monoxide with multiple models
Source: Copernicus journal article supplement (doi:10.5194/acp-16-7285-2016), 2016-06-10
Supplement: Supplementary file [file acp-16-7285-2016-supplement.pdf]

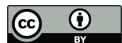

*Supplement of*

## **Interpreting space-based trends in carbon monoxide with multiple models**

**Sarah A. Strode et al.**

*Correspondence to:* Sarah A. Strode ([sarah.a.strode@nasa.gov](mailto:sarah.a.strode@nasa.gov))

The copyright of individual parts of the supplement might differ from the CC-BY 3.0 licence.

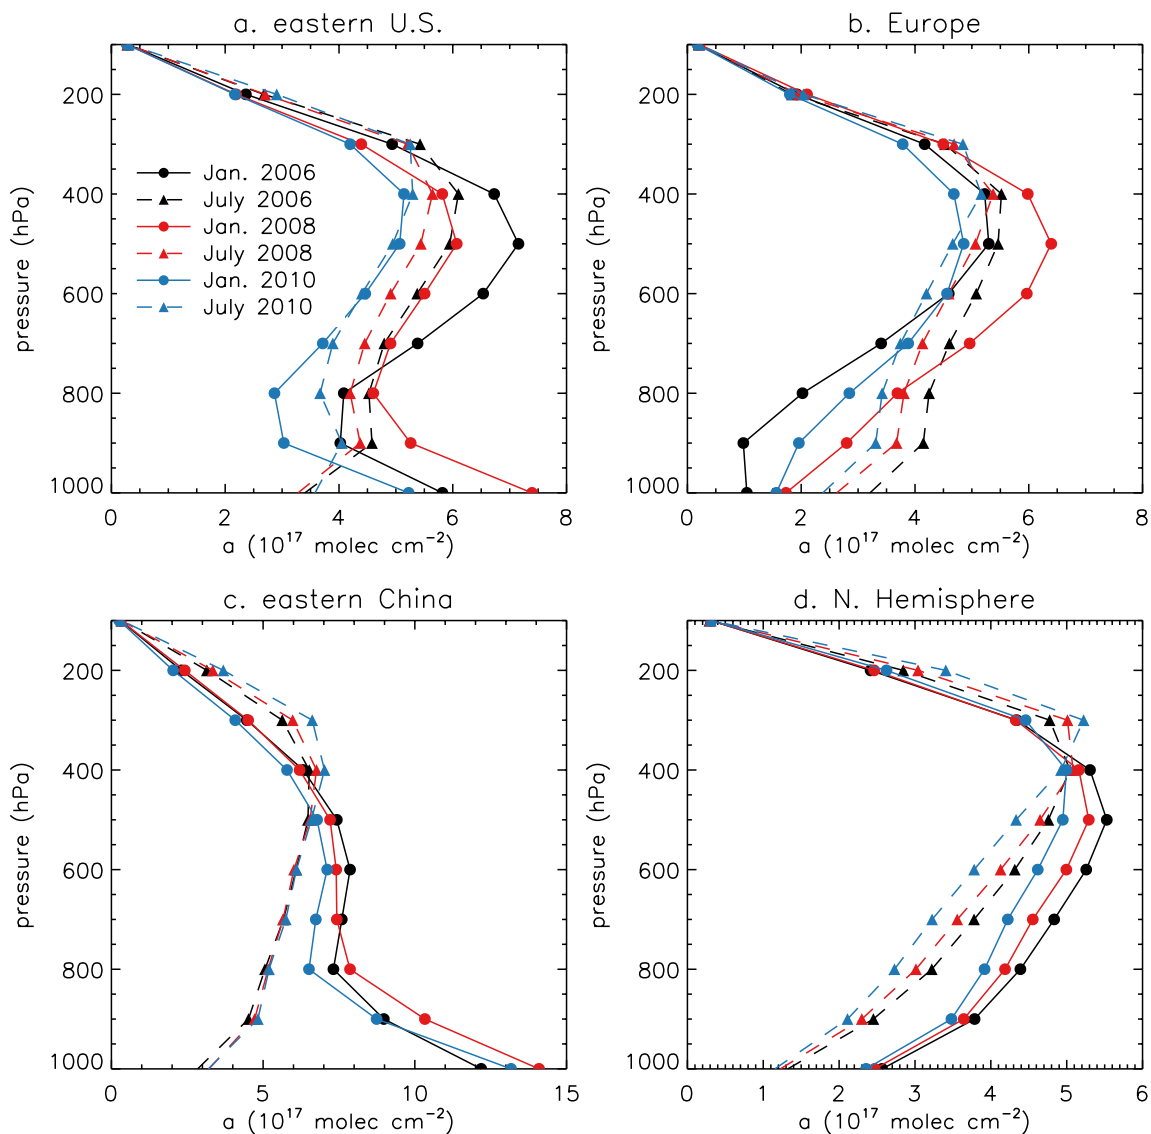

**Supplemental Figure S1:** Regionally averaged monthly column averaging kernels for January (circles) and July (triangles) for 2006 (black), 2008 (red), and 2010 (blue) for (a) the eastern United States, (b) Europe, (c) eastern China, and (d) the northern hemisphere. The region definitions are the same as in Fig. 2.
